# Supplementary material for: Methylation-mediated silencing of microRNA-211 promotes cell growth and epithelial to mesenchymal transition through activation of the AKT/β-catenin pathway in GBM
Source: PubMed Central journal article supplement (PMC5421919; doi:10.18632/oncotarget.15531), 2017-02-20
Supplement: oncotarget-08-25167-s001.pdf [file oncotarget-08-25167-s001.pdf]

# Methylation-mediated silencing of microRNA-211 promotes cell growth and epithelial to mesenchymal transition through activation of the AKT/ $\beta$ -catenin pathway in GBM

## SUPPLEMENTARY FIGURES

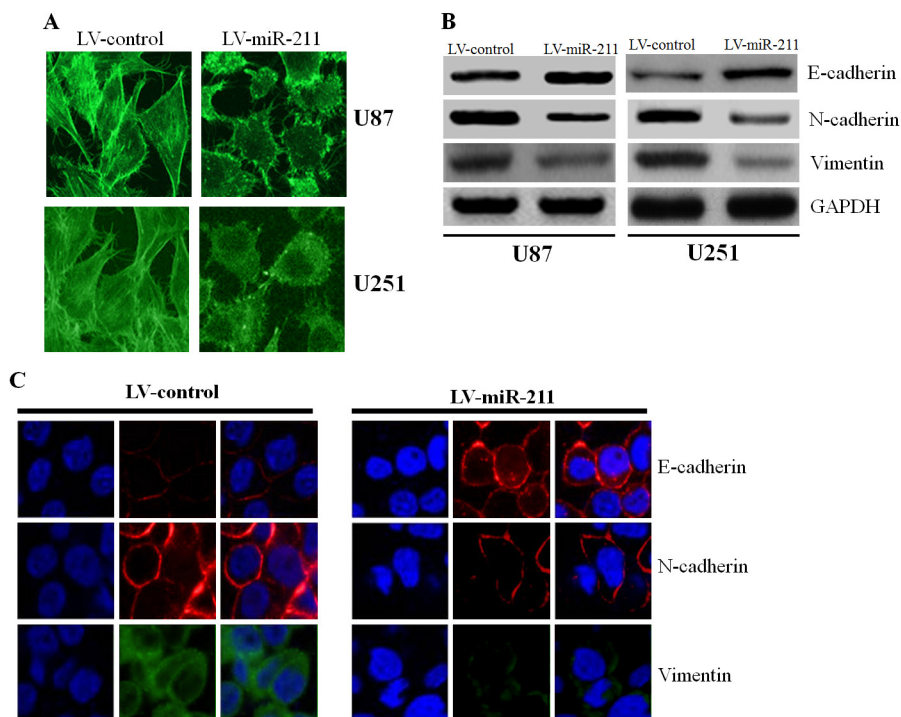

**Supplementary Figure 1:** **A.** Stress fibre formation was suppressed in LV-miR-211 cells when compared with LV-control cells. **B.** Western blot assay revealed that the expression level of E-cadherin was increased, while the expression levels of N-cadherin and Vimentin were decreased in LV-miR-211 cells. **C.** The results of the immunofluorescence assay were similar to the results of the western blot assay.

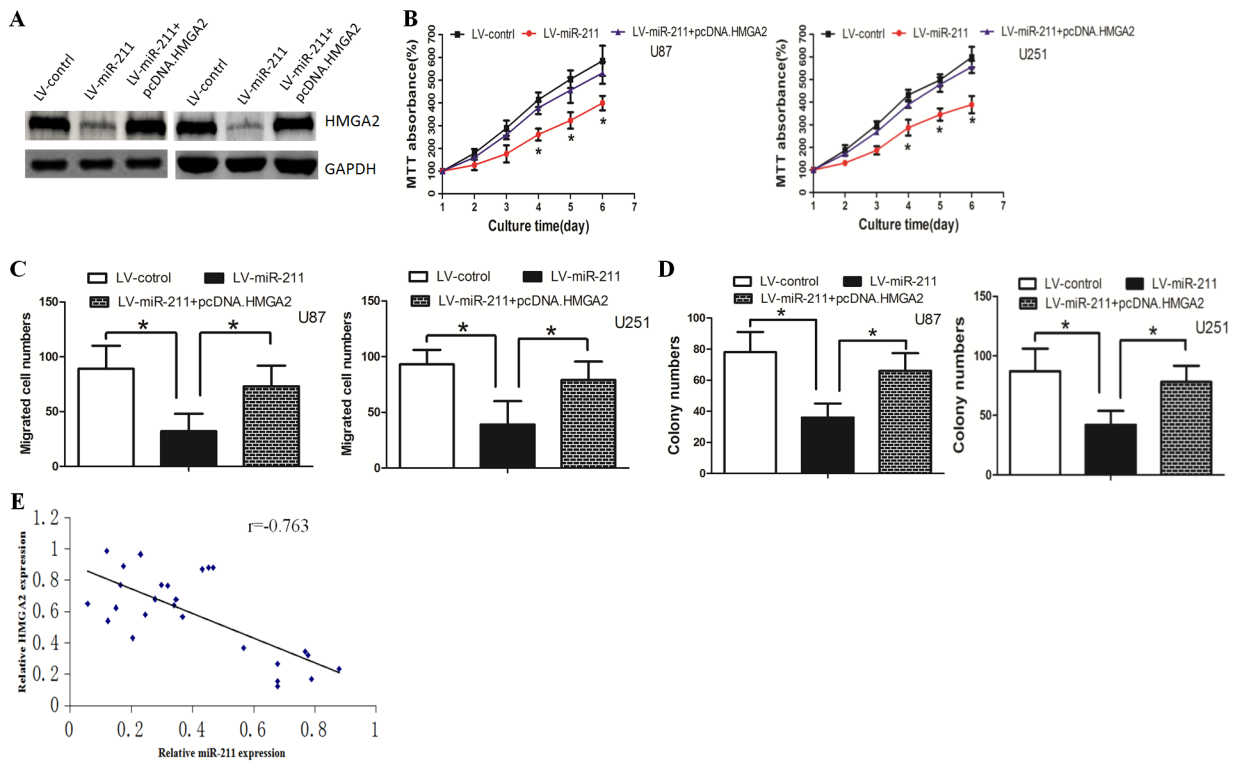

**Supplementary Figure 2:** **A.** Transfection of pcDNA.3-HMGA2 into LV-miR-211 cells could increase the HMGA2 expression. **B.** Overexpression of HMGA2 counteracted the effect of miR-211 on cell proliferation, as determined by MTT assay. **C.** miR-211's effect on cell invasion was rescued by HMGA2 restoration. **D.** The colony formation assay revealed that HMGA2 restoration partly dismissed the effects of miR-211. **E.** There was a negative association between miR-211 and HMGA2 expression in GBM tissues( $r=-0.763$ ).
